# Supplementary material for: Harnessing deep neural networks to solve inverse problems in quantum dynamics: machine-learned predictions of time-dependent optimal control fields
Source: Royal Society of Chemistry journal article supplement (doi:10.1039/d0cp03694c), 2020-01-01
Supplement: d0cp03694c1.pdf [file d0cp03694c1.pdf]

## **Supplementary Information for *Harnessing Deep Neural Networks to Solve Inverse Problems in Quantum Dynamics: Machine-Learned Predictions of Time-Dependent Optimal Control Fields***

Xian Wang<sup>†,1</sup>, Anshuman Kumar<sup>†,2</sup>, Christian R. Shelton,<sup>3</sup> and Bryan M. Wong<sup>4, a)</sup>

<sup>1)</sup>*Department of Physics & Astronomy, University of California-Riverside, Riverside, CA, 92521*

<sup>2)</sup>*Material Science & Engineering Program, University of California-Riverside, Riverside, CA, 92521*

<sup>3)</sup>*Department of Computer Science & Engineering, University of California-Riverside, Riverside, CA, 92521*

<sup>4)</sup>*Department of Physics & Astronomy, Material Science & Engineering Program, Department of Chemical & Environmental Engineering, and Department of Chemistry, University of California-Riverside, Riverside, CA, 92521*

---

<sup>a)</sup>Electronic mail: [bryan.wong@ucr.edu](mailto:bryan.wong@ucr.edu); <http://www.bmwong-group.com>

<sup>†</sup>X. W. and A. K. contributed equally to this work

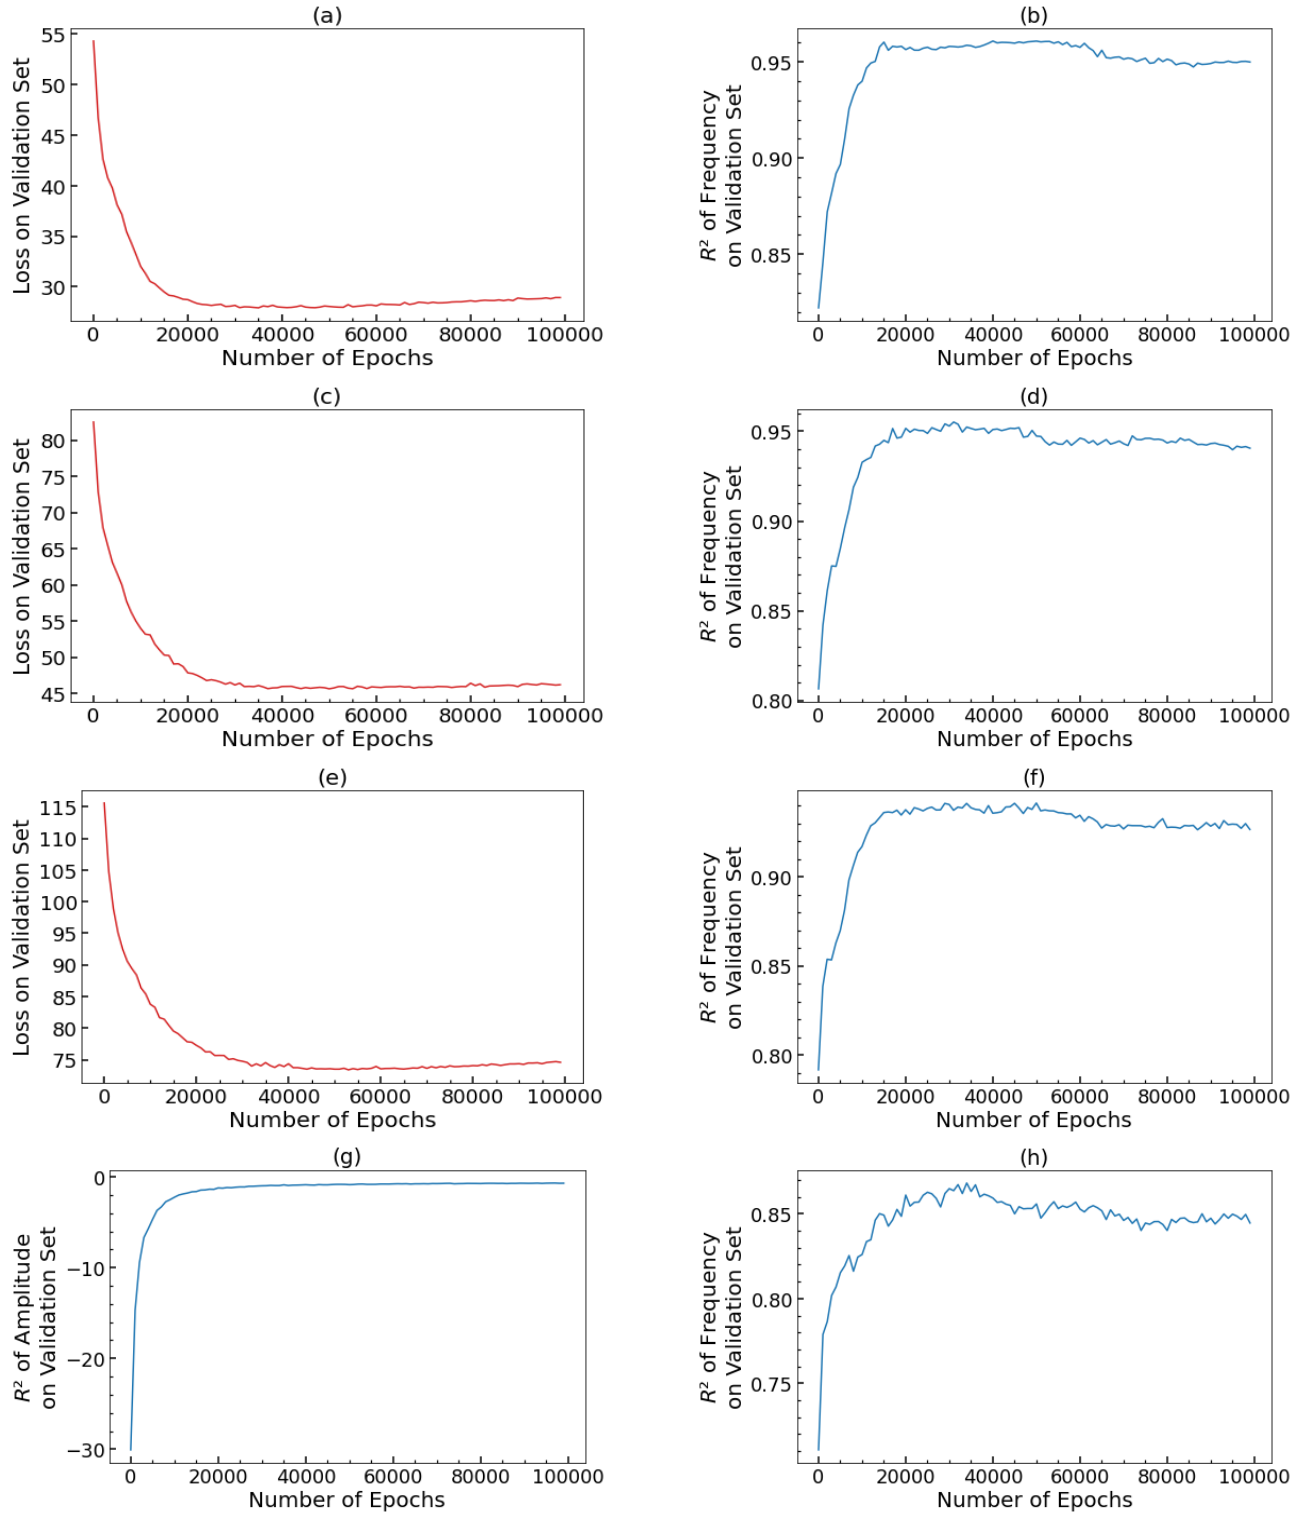

FIG. 1: Plots of the loss vs. the number of epochs for the (a) 600-, (c) 800-, and (e) 1000-output-layer-unit model for the validation dataset. Plots of  $R^2$  values for the predicted frequency vs. the number of epochs for the (b) 600-, (d) 800-, and (f) 1000-output-layer-unit model for the validation dataset. (g) Plot of  $R^2$  values for the predicted amplitude vs. the number of epochs for the 1000-output-layer-unit model for the validation dataset. Using the  $R^2$  definition in the main text, the amplitude  $R^2$  becomes negative-valued, which also manifests itself in the the 600- and 800-output-layer-unit models (not plotted here). (h) Plot of  $R^2$  values for the predicted frequency vs. the number of epochs for the 1000-output-layer-unit model when only 2 hidden layers are used.

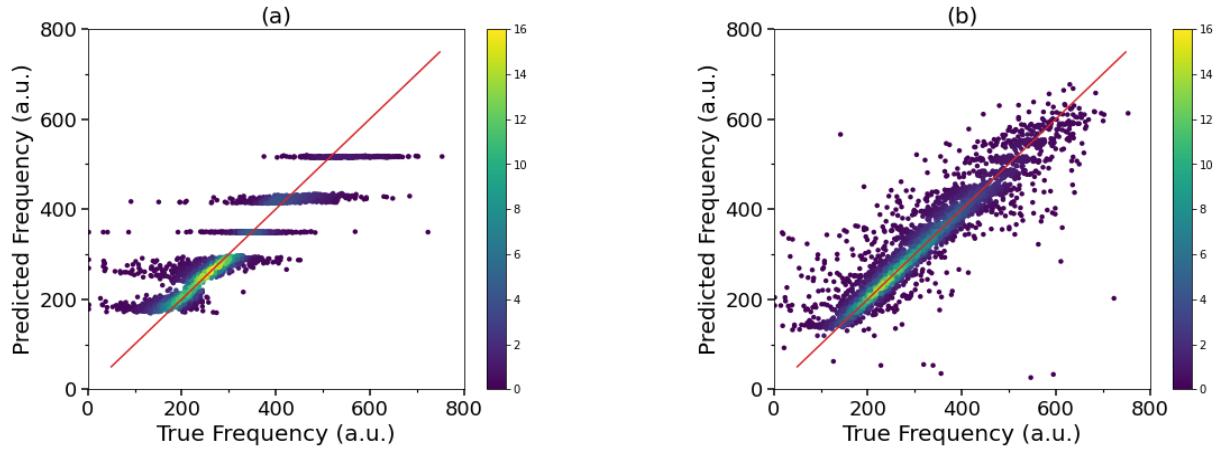

FIG. 2: Density plot of the predicted and true resonance frequencies for the (a) 600-output-layer-unit model for the unscaled amplitude (i.e., when the amplitude is not multiplied by 80), and (b) 1,000-output-layer-unit model with only 2 hidden layers. The diagonal line in each plot represents a perfect match between the machine-learned predictions and the true values. The vertical color bar in each sub-plot indicates the density of the data points.
